# Supplementary material
Source: PubMed Central journal article supplement (PMC7530813)
Supplement: jamaotolaryngolheadnecksurg-e203040-s001.pdf [file jamaotolaryngolheadnecksurg-e203040-s001.pdf]

## Supplementary Online Content

Peterson AM, Kallogjeri D, Spitznagel E, Chakinala MM, Scheider JS, Piccirillo JF. Development and validation of the Nasal Outcome Score for Epistaxis in Hereditary Hemorrhagic Telangiectasia (NOSE HHT). *JAMA Otolaryngol Head Neck Surg*. Published online October 1, 2020. doi:10.1001/jamaoto.2020.3040

**eTable 1.** Principal Components Factor Analysis Loading of NOSE HHT Items

**eTable 2.** Pearson Correlation of SF-36 and NOSE HHT Scores

This supplementary material has been provided by the authors to give readers additional information about their work.

**eTable 1**

**Principal Components Factor Analysis Loading of NOSE HHT Items**

| <b>Instrument Item</b>                               | <b>Factor 1 –<br/>Functional<br/>Limitations</b> | <b>Factor 2 –<br/>Emotional<br/>Consequences</b> | <b>Factor 3 –<br/>Physical<br/>Problems</b> | <b>Uniqueness<br/>Value</b> |
|------------------------------------------------------|--------------------------------------------------|--------------------------------------------------|---------------------------------------------|-----------------------------|
| <b>Physical Problems</b>                             |                                                  |                                                  |                                             |                             |
| Blood running down back of your throat               |                                                  |                                                  | 0.496                                       | 0.525                       |
| Blocked up/stuffy nose                               |                                                  |                                                  | 0.904                                       | 0.339                       |
| Nasal crusting                                       |                                                  |                                                  | 0.679                                       | 0.516                       |
| Fatigue                                              | 0.533                                            |                                                  |                                             | 0.466                       |
| Shortness of breath                                  | 0.481                                            |                                                  | 0.364                                       | 0.480                       |
| Decreased sense of smell/taste                       |                                                  |                                                  | 0.608                                       | 0.623                       |
| <b>Functional Limitations</b>                        |                                                  |                                                  |                                             |                             |
| Blow your nose                                       |                                                  | 0.314                                            |                                             | 0.555                       |
| Bend over/pick something up off the ground           | 0.413                                            |                                                  |                                             | 0.482                       |
| Breathe through your nose                            |                                                  |                                                  | 0.765                                       | 0.363                       |
| Exercise                                             | 0.726                                            |                                                  |                                             | 0.305                       |
| Work at your job (or school)                         | 0.641                                            |                                                  |                                             | 0.365                       |
| Stay asleep                                          | 0.487                                            |                                                  |                                             | 0.493                       |
| Enjoy time with family/friends                       | 0.613                                            |                                                  |                                             | 0.317                       |
| Eat certain foods (e.g. spicy)                       | 0.563                                            |                                                  |                                             | 0.651                       |
| Have intimacy with spouse or significant other       | 0.521                                            |                                                  |                                             | 0.533                       |
| Travel (e.g. by plane)                               | 0.669                                            |                                                  |                                             | 0.465                       |
| Fall asleep                                          | 0.525                                            |                                                  |                                             | 0.532                       |
| Clean your house/apartment                           | 0.917                                            |                                                  |                                             | 0.318                       |
| Go outdoors regardless of the weather/season         | 0.744                                            |                                                  |                                             | 0.423                       |
| Cook/prepare meal                                    | 0.914                                            |                                                  |                                             | 0.350                       |
| <b>Emotional Consequences</b>                        |                                                  |                                                  |                                             |                             |
| Fear of nosebleeds in public                         |                                                  | 0.916                                            |                                             | 0.270                       |
| Fear of not knowing when your next nosebleed will be |                                                  | 0.834                                            |                                             | 0.300                       |
| Getting blood on your clothes                        |                                                  | 0.580                                            |                                             | 0.513                       |
| Fear of not being able to stop a nosebleed           |                                                  | 0.721                                            |                                             | 0.360                       |
| Embarrassment                                        |                                                  | 0.836                                            |                                             | 0.338                       |
| Frustration/restlessness/irritability                | 0.410                                            | 0.529                                            |                                             | 0.381                       |
| Reduced concentration                                | 0.461                                            | 0.454                                            |                                             | 0.381                       |
| Sadness                                              | 0.387                                            | 0.558                                            |                                             | 0.392                       |
| The need to buy new clothes                          | 0.357                                            |                                                  |                                             | 0.607                       |

| <b>eTable 2</b>                                                                                                                                                                                                                                  |           |           |           |           |            |           |           |           |
|--------------------------------------------------------------------------------------------------------------------------------------------------------------------------------------------------------------------------------------------------|-----------|-----------|-----------|-----------|------------|-----------|-----------|-----------|
| <b>Pearson Correlation of SF-36 and NOSE HHT Scores</b>                                                                                                                                                                                          |           |           |           |           |            |           |           |           |
| <b>NOSE HHT Outcome Measure</b>                                                                                                                                                                                                                  | <b>PF</b> | <b>RP</b> | <b>RE</b> | <b>EF</b> | <b>EWB</b> | <b>SF</b> | <b>BP</b> | <b>GH</b> |
| <b>Physical Problems</b>                                                                                                                                                                                                                         | -0.50     | -0.54     | -0.38     | -0.48     | -0.35      | -0.53     | -0.42     | -0.53     |
| <b>Functional Limitations</b>                                                                                                                                                                                                                    | -0.61     | -0.65     | -0.47     | -0.50     | -0.45      | -0.67     | -0.51     | -0.57     |
| <b>Emotional Consequences</b>                                                                                                                                                                                                                    | -0.50     | -0.53     | -0.45     | -0.49     | -0.51      | -0.63     | -0.38     | -0.51     |
| <b>Total NOSE HHT Score</b>                                                                                                                                                                                                                      | -0.61     | -0.64     | -0.49     | -0.54     | -0.50      | -0.69     | -0.49     | -0.59     |
| <b>PF = physical functioning, RP = role limitations due to physical health, RE = role limitations due to emotional problems, EF = energy/fatigue, EWB = emotional well-being, SF = social functioning, BP = bodily pain, GH = general health</b> |           |           |           |           |            |           |           |           |
